# Supplementary material for: Zhi-Zi-Chi Decoction Reverses Depressive Behaviors in CUMS Rats by Reducing Oxidative Stress Injury Via Regulating GSH/GSSG Pathway
Source: PubMed Central journal article supplement (PMC9021728; doi:10.3389/fphar.2022.887890), 2022-04-07
Supplement: Table1.pdf [file Table1.pdf]

Table S1. The results of method validation.

| Compound                    | Regression equation    | R <sup>2</sup> | Precision(%) | Repeatability(%) | Stability(%) | Recovery(%) |
|-----------------------------|------------------------|----------------|--------------|------------------|--------------|-------------|
| Genipin-1-β-D-gentiobioside | y = 5,445.1x + 10,175  | 0.9999         | 1.7          | 2.0              | 1.3          | 0.5         |
| Geniposide                  | y = 7,897.5x + 289,745 | 0.9995         | 1.2          | 0.3              | 0.8          | 1.0         |
| Daidzin                     | y = 22,070x - 2,437.4  | 0.9999         | 1.3          | 0.3              | 0.5          | 1.5         |
| Glycitin                    | y = 32,742x - 3,296.5  | 0.9999         | 1.1          | 1.8              | 3.6          | 1.9         |
| Genistin                    | y = 36,003x - 7,412.6  | 0.9999         | 1.3          | 1.4              | 0.9          | 2.9         |
| Daidzein                    | y = 35,387x - 1,998.9  | 0.9999         | 2.1          | 3.7              | 4.2          | 1.3         |
