# Supplementary material for: Zhi-Zi-Chi Decoction Reverses Depressive Behaviors in CUMS Rats by Reducing Oxidative Stress Injury Via Regulating GSH/GSSG Pathway
Source: PubMed Central journal article supplement (PMC9021728; doi:10.3389/fphar.2022.887890), 2022-04-07
Supplement: Table2.pdf [file Table2.pdf]

Table S2. MS data for characterization of compounds in ZZCD.

| NO. | Formula   | tR(min) | Molecular Weight | MS(+)              | MS(-)                 | Compound Identification      |
|-----|-----------|---------|------------------|--------------------|-----------------------|------------------------------|
| 1   | C16H22O11 | 3.366   | 390.1189         |                    | 389.1114[M-H]-        | Deacetylasperulosidic acid   |
| 2   | C16H22O10 | 3.962   | 374.1222         | 357.118[M+H-H2O]+  | 373.1154[M-H]-        | Gardoside                    |
| 3   | C16H24O11 | 3.962   | 392.133          |                    | 373.1153[M-H-H2O]-    | Shanzhiside                  |
| 4   | C16H18O9  | 4.194   | 354.0961         |                    | 353.0882[M-H]-        | 3-O-Caffeoylquinic acid      |
| 5   | C18H26O13 | 4.284   | 450.1389         |                    | 449.1318[M-H]-        | Gardenoside                  |
| 6   | C23H22O11 | 4.284   | 474.1141         |                    | 501.1014[M+HCOO-H2O]- | 6"-O-Acetylgenistin          |
| 7   | C24H22O12 | 4.301   | 502.1096         |                    | 501.1014[M-H]-        | Malonyldaidzin               |
| 8   | C23H34O15 | 4.905   | 550.1909         | 573.1827[M+Na]+    | 549.1831[M-H]-        | Genipin-1-β-D-gentiobioside  |
| 9   | C17H24O10 | 5.26    | 388.1344         |                    | 433.1313[M+HCOO]-     | Geniposide                   |
| 10  | C17H26O11 | 5.26    | 406.145          |                    | 433.1313[M+HCOO-H2O]- | Shanzhiside methylester      |
| 11  | C11H14O5  | 5.269   | 226.0843         | 227.0924[M+H]+     | 225.0766[M-H]-        | Genipin                      |
| 12  | C17H26O10 | 5.442   | 390.1508         |                    | 435.1513[M+HCOO]-     | Loganin                      |
| 13  | C21H20O9  | 5.575   | 416.1117         | 417.1191[M+H]+     | 461.1103[M+HCOO]-     | Daidzin                      |
| 14  | C16H26O7  | 5.616   | 330.1686         | 331.1782[M+H]+     | 375.1665[M+HCOO]-     | Jasminoside A                |
| 15  | C22H22O10 | 5.658   | 446.1199         | 447.1313[M+H]+     | 491.1189[M+HCOO]-     | Glycitin                     |
| 16  | C9H8O3    | 5.798   | 164.0477         | 147.0443[M+H-H2O]+ | 163.0403[M-H]-        | P-coumaric acid              |
| 17  | C16H26O8  | 5.864   | 346.1624         | 329.1595[M+H-H2O]+ | 373.1499[M+HCOO-H2O]- | Jasminoside B                |
| 18  | C21H20O10 | 6.22    | 432.109          | 433.1163[M+H]+     | 477.1058[M+HCOO]-     | Genistin                     |
| 19  | C24H22O13 | 6.22    | 518.1041         |                    | 545.0922[M+HCOO-H2O]- | Malonylgenistin              |
| 20  | C22H36O12 | 6.824   | 492.2216         | 510.2564[M+NH4]+   | 537.2215[M+HCOO]-     | Jasminoside I                |
| 21  | C21H34O11 | 7.204   | 462.2116         | 485.203[M+Na]+     | 507.21[M+HCOO]-       | Jasminoside T                |
| 22  | C15H10O4  | 7.353   | 254.0573         | 255.0668[M+H]+     | 253.0502[M-H]-        | Daidzein                     |
| 23  | C16H12O5  | 7.516   | 284.0698         | 285.0759[M+H]+     |                       | Glycitein                    |
| 24  | C32H44O14 | 8.627   | 652.2735         | 675.2654[M+Na]+    | 697.2723[M+HCOO]-     | beta-D-gentiobiosyl crocetin |
| 25  | C10H16O3  | 9.09    | 184.1101         | 167.1072[M+H-H2O]+ | 165.0928[M-H-H2O]-    | Jasminodiol                  |
