# Supplementary material for: Zhi-Zi-Chi Decoction Reverses Depressive Behaviors in CUMS Rats by Reducing Oxidative Stress Injury Via Regulating GSH/GSSG Pathway
Source: PubMed Central journal article supplement (PMC9021728; doi:10.3389/fphar.2022.887890), 2022-04-07
Supplement: Table3.pdf [file Table3.pdf]

Table S3. The contents of six compounds in ZZCD.

| NO | t <sub>R</sub> (min) | Formula                                         | Identified compound         | Contents in ZZCD (mg/g) |
|----|----------------------|-------------------------------------------------|-----------------------------|-------------------------|
| 1  | 10.12                | C <sub>23</sub> H <sub>34</sub> O <sub>15</sub> | Genipin-1-β-D-gentiobioside | 36.010 ± 0.671          |
| 2  | 14.01                | C <sub>17</sub> H <sub>24</sub> O <sub>10</sub> | Geniposide                  | 328.717 ± 0.540         |
| 3  | 20.33                | C <sub>21</sub> H <sub>20</sub> O <sub>9</sub>  | Daidzin                     | 2.062 ± 0.005           |
| 4  | 22.39                | C <sub>22</sub> H <sub>22</sub> O <sub>10</sub> | Glycitin                    | 0.168 ± 0.003           |
| 5  | 30.64                | C <sub>21</sub> H <sub>20</sub> O <sub>10</sub> | Genistin                    | 1.304 ± 0.020           |
| 6  | 43.74                | C <sub>15</sub> H <sub>10</sub> O <sub>4</sub>  | Daidzein                    | 1.160 ± 0.044           |
